# Supplementary material for: Mild activation of CeO2-supported gold nanoclusters and insight into the catalytic behavior in CO oxidation
Source: Royal Society of Chemistry journal article supplement (doi:10.1039/c5nr07498c), 2016-01-01
Supplement: c5nr07498c1.pdf [file c5nr07498c1.pdf]

Supporting Information

# Mild activation of CeO<sub>2</sub>-supported gold nanoclusters and insight into the catalytic behavior in CO oxidation

Weili Li<sup>1,4</sup>, Qingjie Ge<sup>1,\*</sup>, Xiangang Ma<sup>1</sup>, Yuxiang Chen,<sup>2</sup> Manzhou Zhu<sup>3</sup>, Hengyong Xu<sup>1</sup>, Rongchao Jin<sup>2,\*</sup>

<sup>1</sup> Dalian National Laboratory for Clean Energy, Dalian Institute of Chemical Physics, Chinese Academy of Sciences, Dalian 116023, China

<sup>2</sup> Department of Chemistry, Carnegie Mellon University, Pittsburgh, Pennsylvania 15213, United States

<sup>3</sup> Department of Chemistry, Anhui University, Hefei 230026, China

<sup>4</sup> University of Chinese Academy of Sciences, Beijing 100049, China

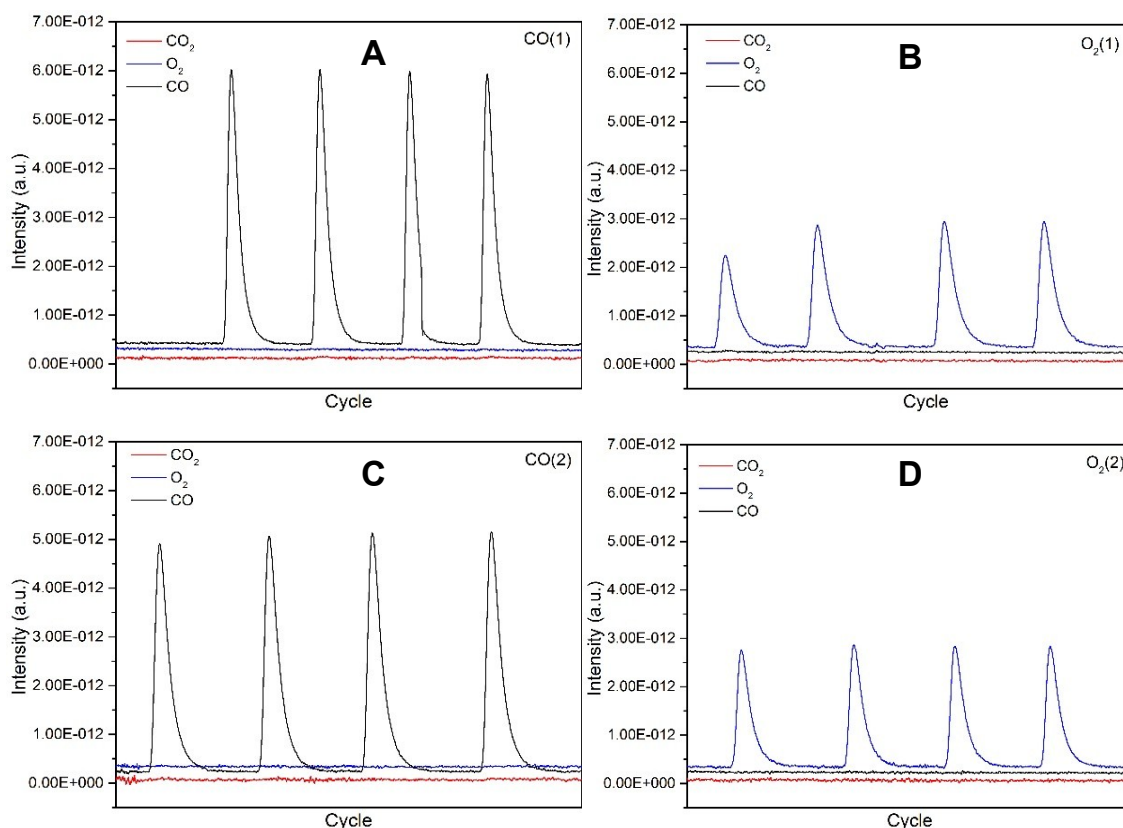

**Figure S1.** MS signals of CO, O<sub>2</sub> and CO<sub>2</sub> during the pulse experiments at room temperature over the activated Au<sub>144</sub>(SR)<sub>60</sub>/CeO<sub>2</sub> catalysts, (A) CO was pulsed into the reactor but no CO<sub>2</sub> was detected, (B) A sequence of O<sub>2</sub> (O<sub>2</sub>(1)) were pulsed into the reactor after CO(1), no CO<sub>2</sub> signal was observed, (C) The second sequence of CO pulses, (D) The subsequent sequence of O<sub>2</sub> pulses. (Black: CO, blue: O<sub>2</sub>, red: CO<sub>2</sub>).

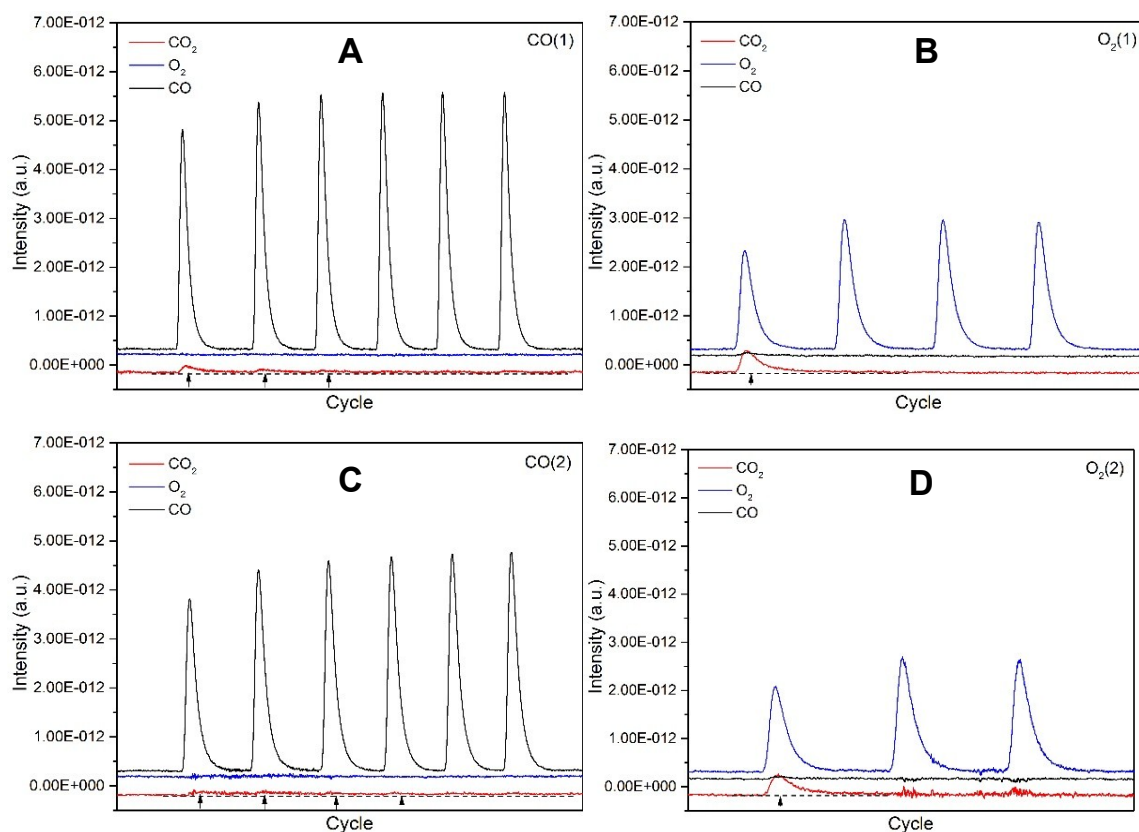

**Figure S2.** MS signals of CO, O<sub>2</sub> and CO<sub>2</sub> during the pulse experiments at 80 °C over the activated Au<sub>144</sub>(SR)<sub>60</sub>/CeO<sub>2</sub> catalysts. (A) CO was pulsed into the reactor, with CO<sub>2</sub> detected, (B) A sequence of O<sub>2</sub> (O<sub>2</sub>(1)) were pulsed into the reactor after CO(1), with CO<sub>2</sub> observed, (C) The second sequence of CO pulses, (D) The subsequent sequence of O<sub>2</sub> pulses. (Black: CO, blue: O<sub>2</sub>, red: CO<sub>2</sub>).
